# Supplementary material for: Whole genomes define concordance of matched primary, xenograft, and organoid models of pancreas cancer
Source: PLOS journal article supplement (doi:10.1371/journal.pcbi.1006596), 2019-01-10

PCSI\_0590

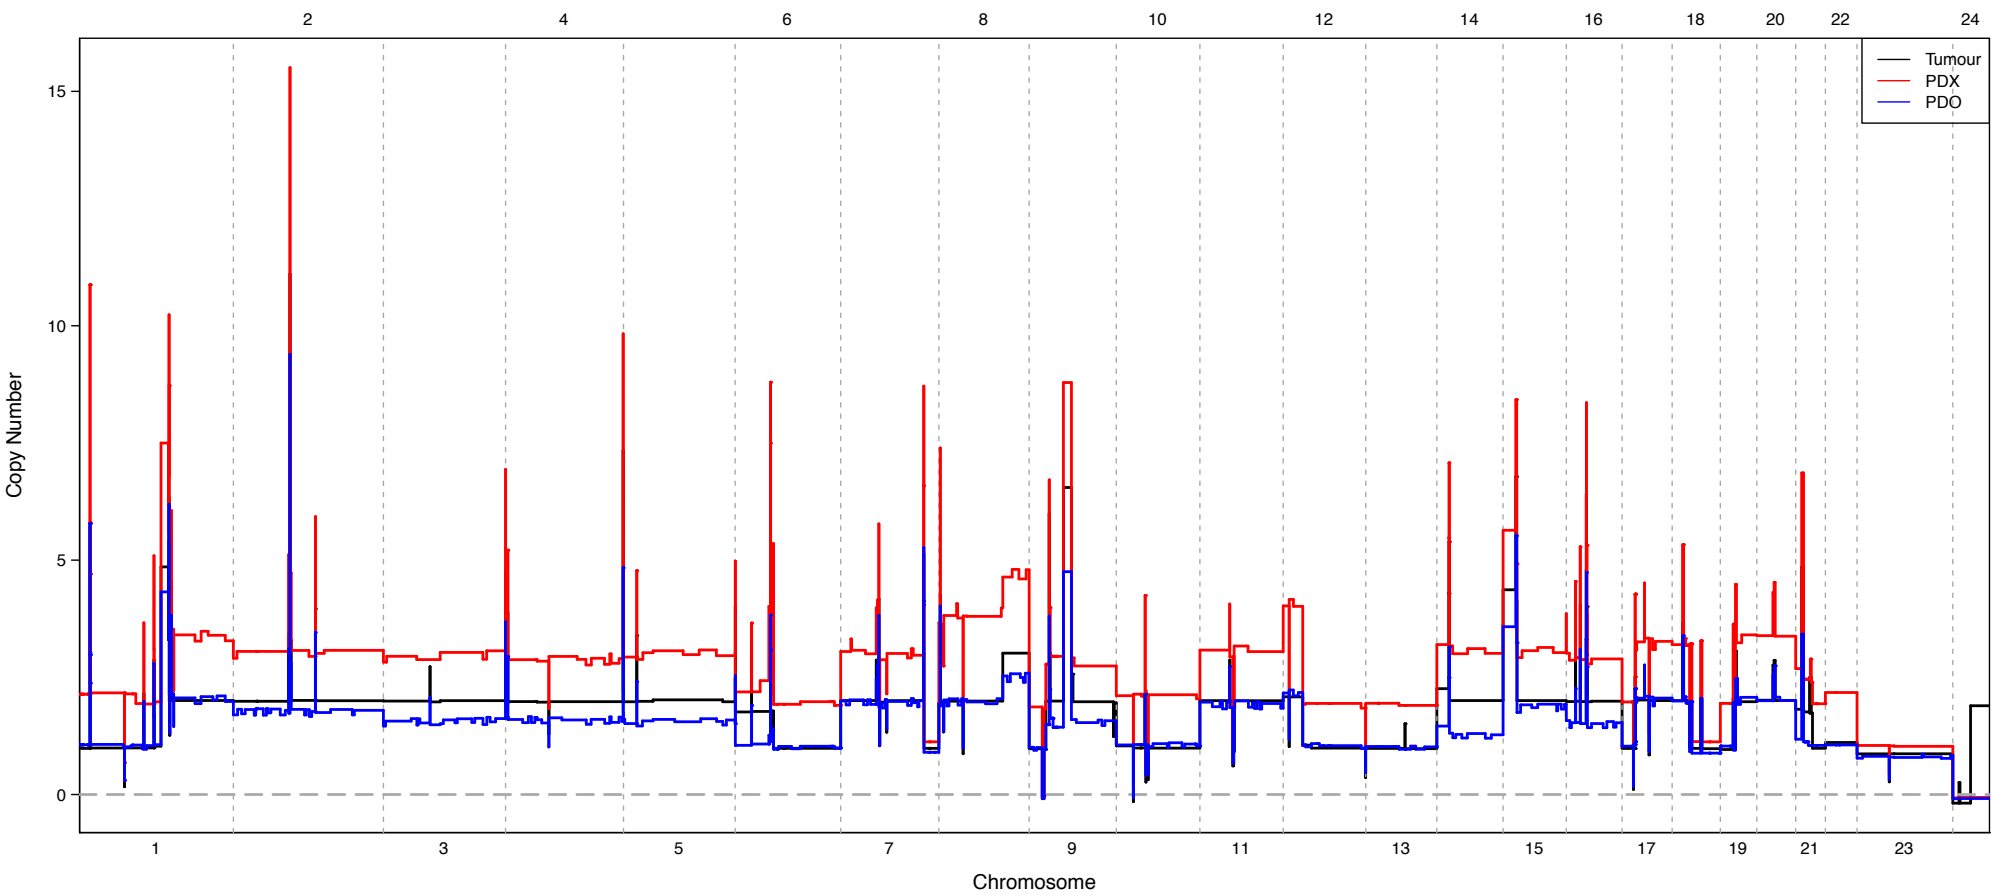

PCSI\_0590

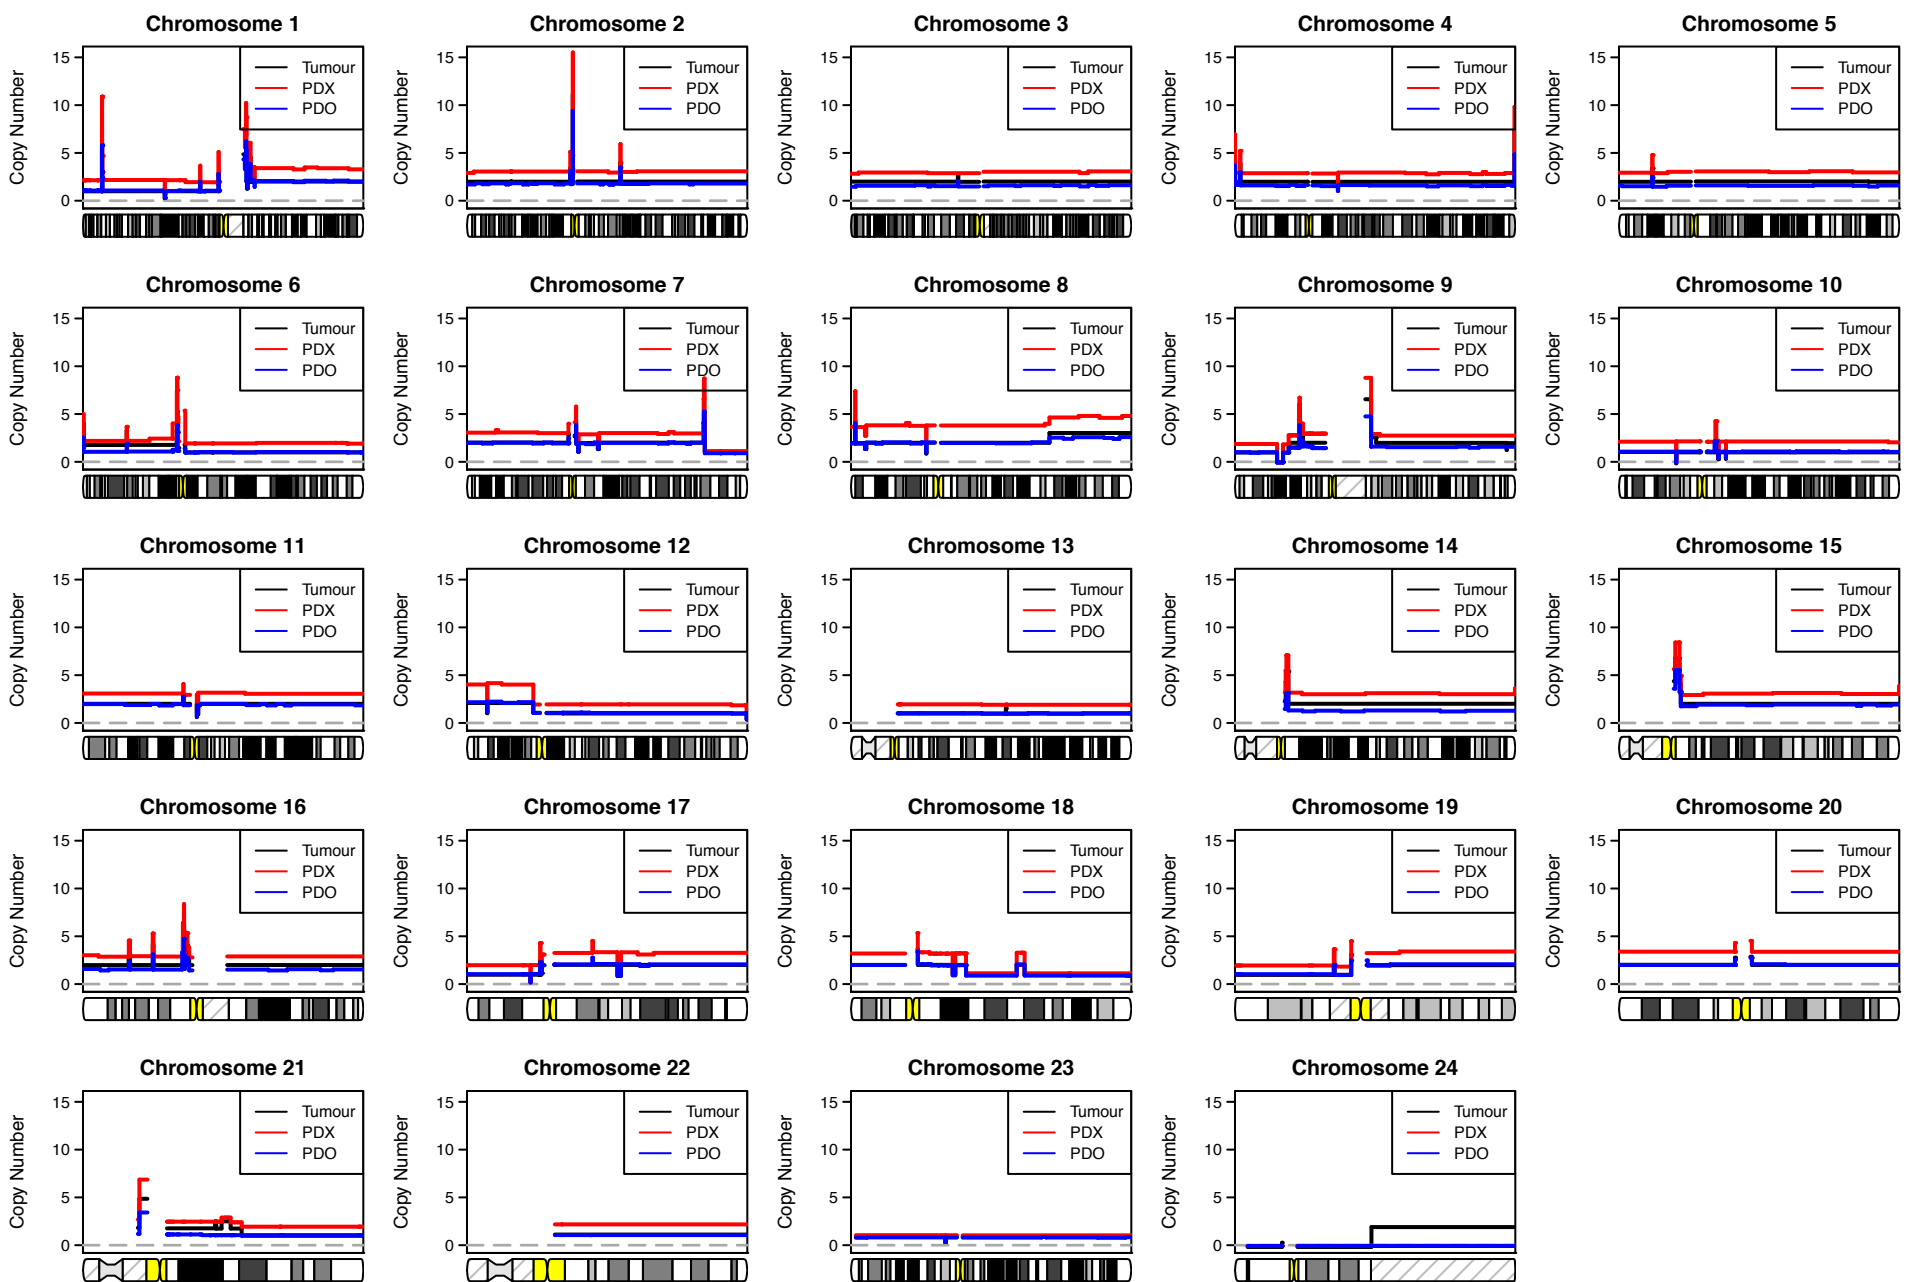

PCSI\_0624

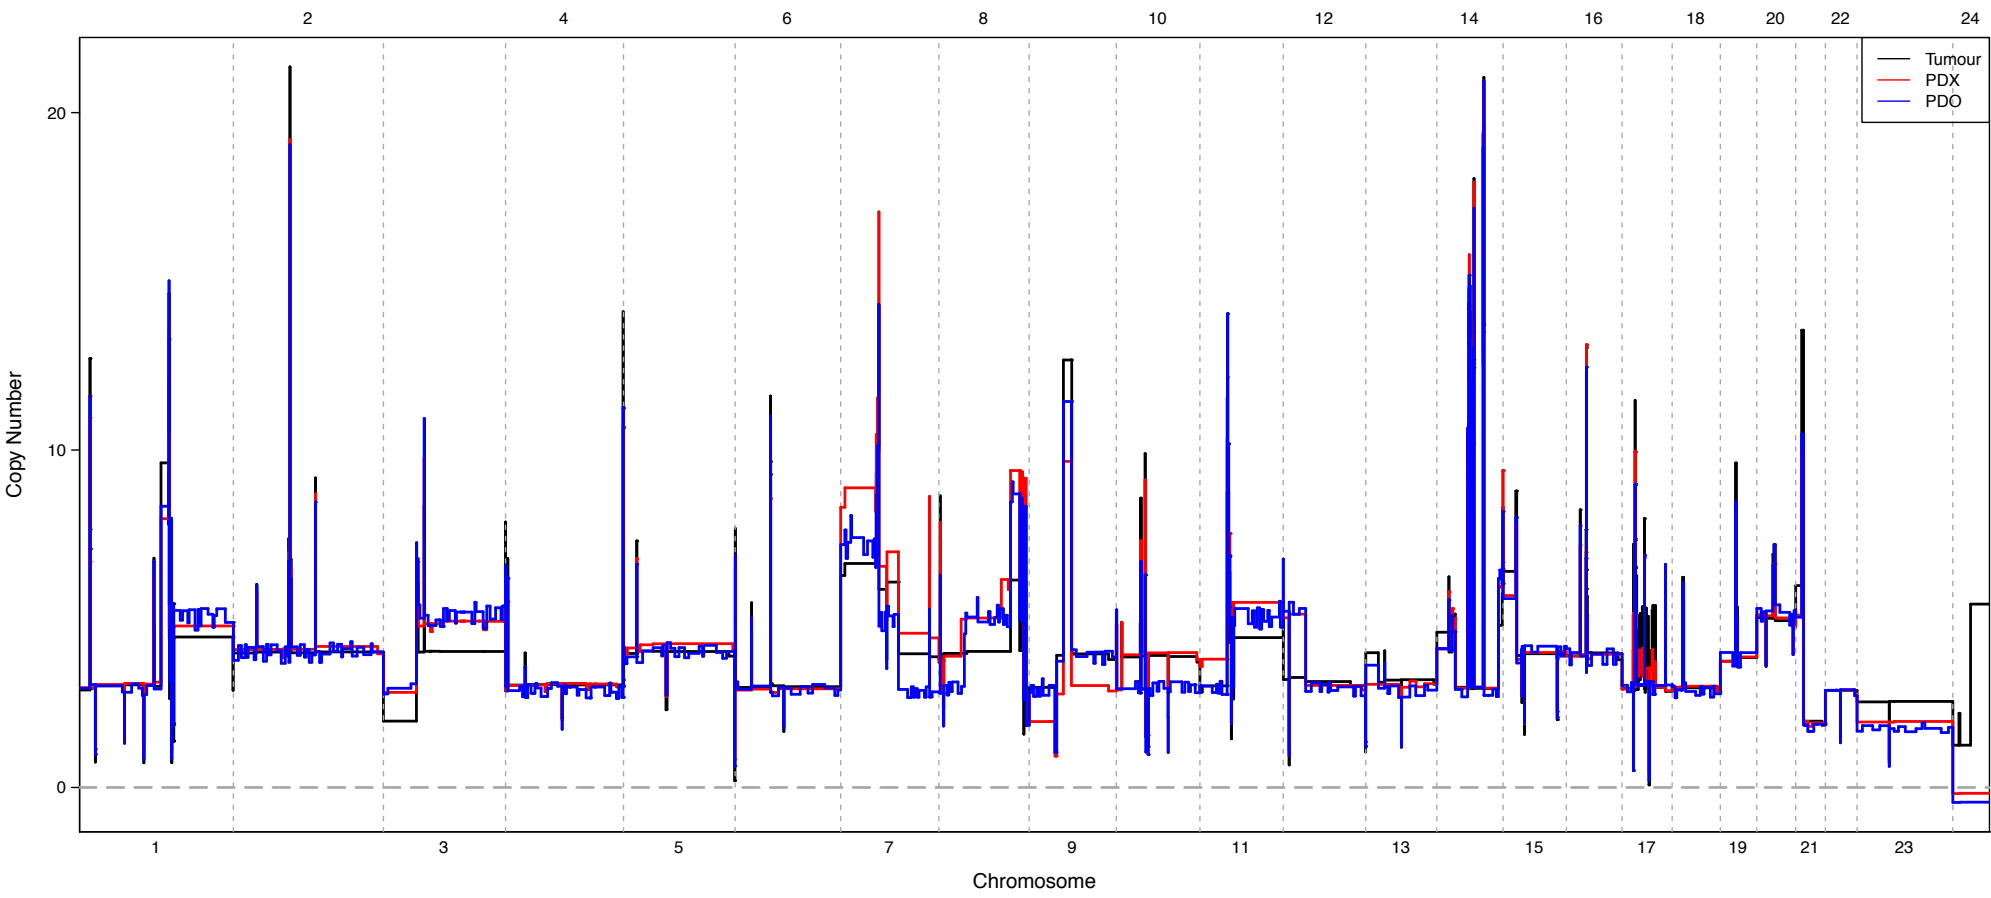

PCSI\_0624

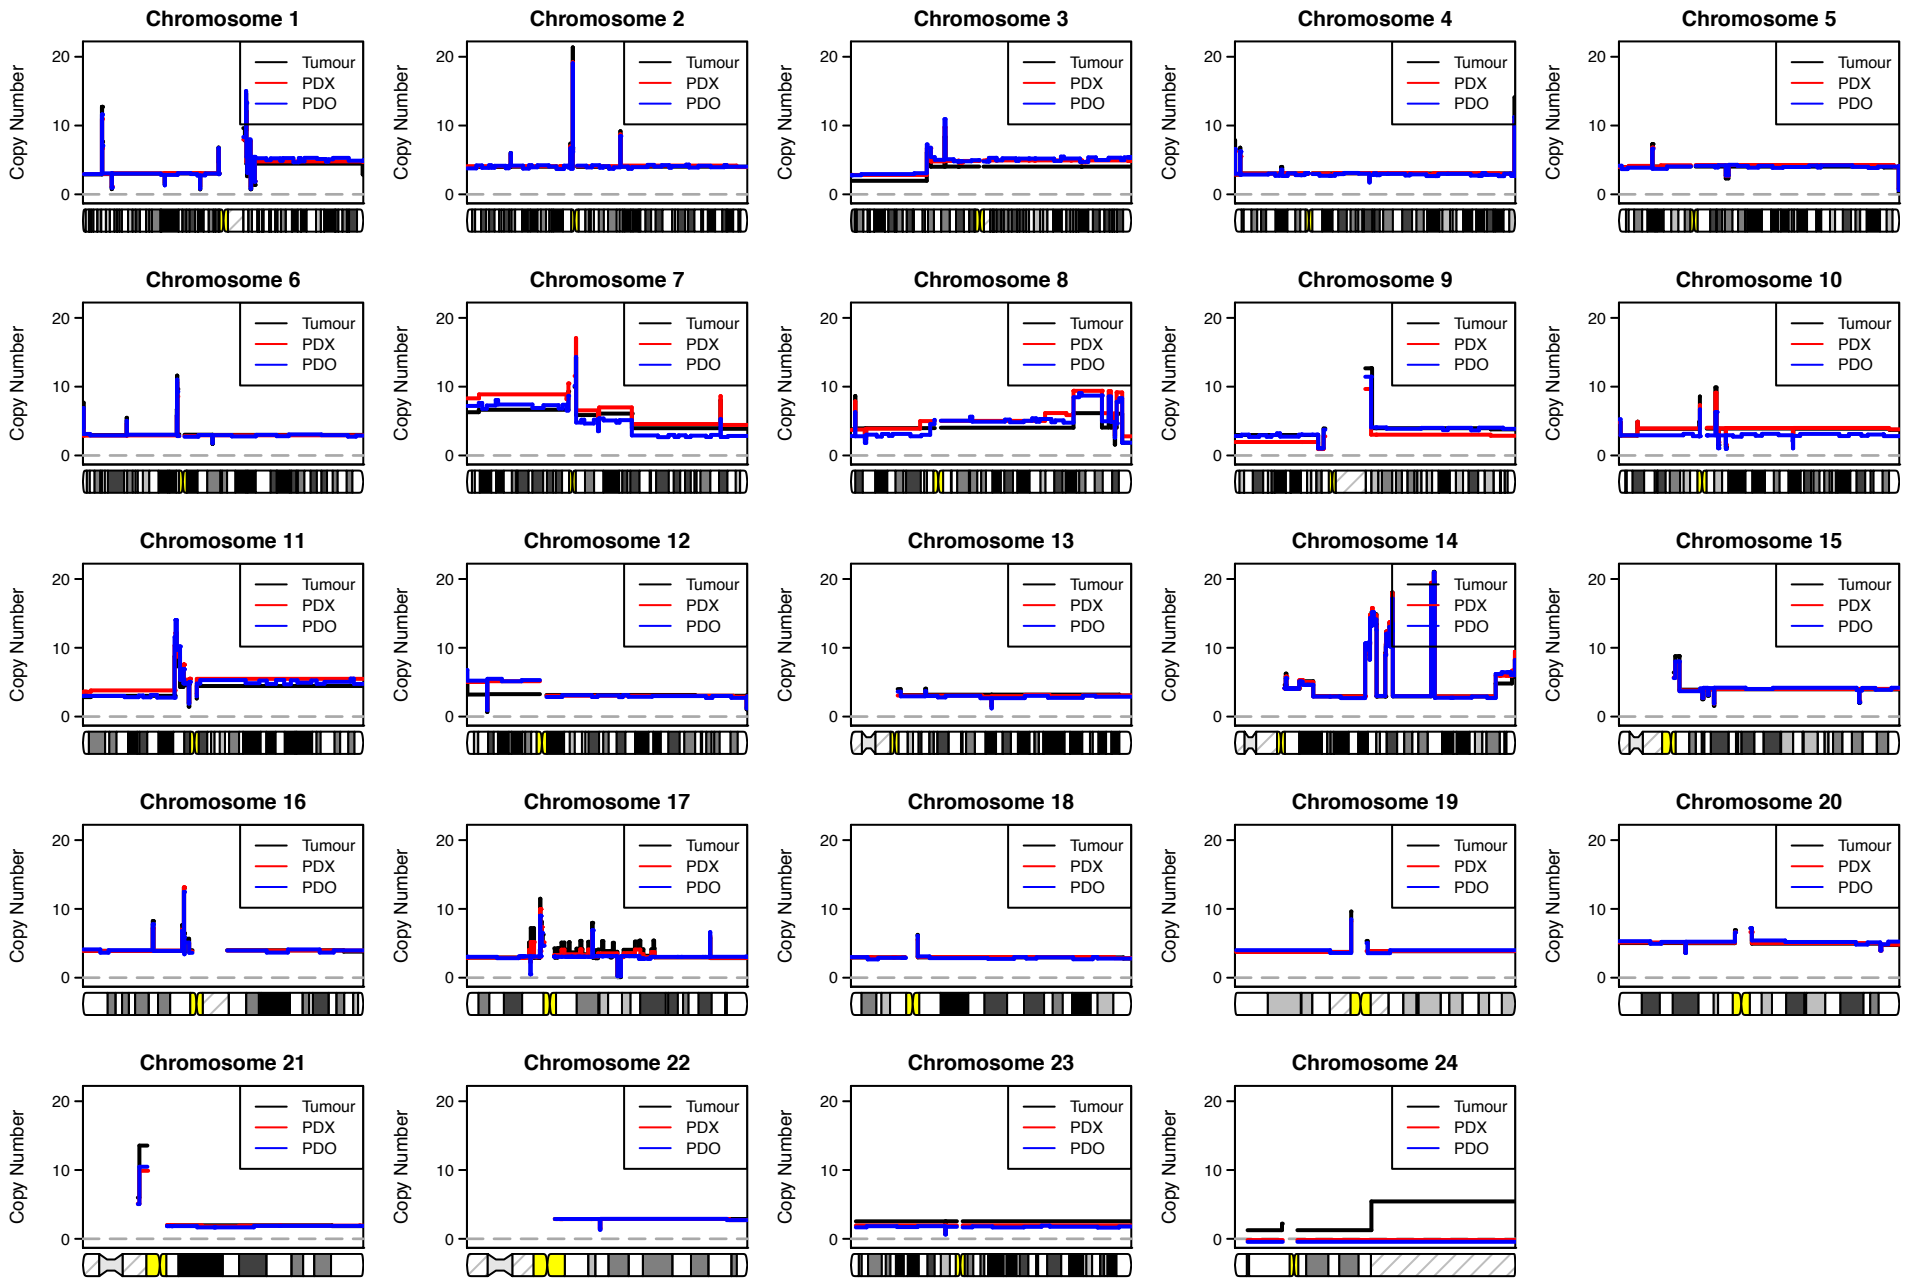

PCSI\_0642

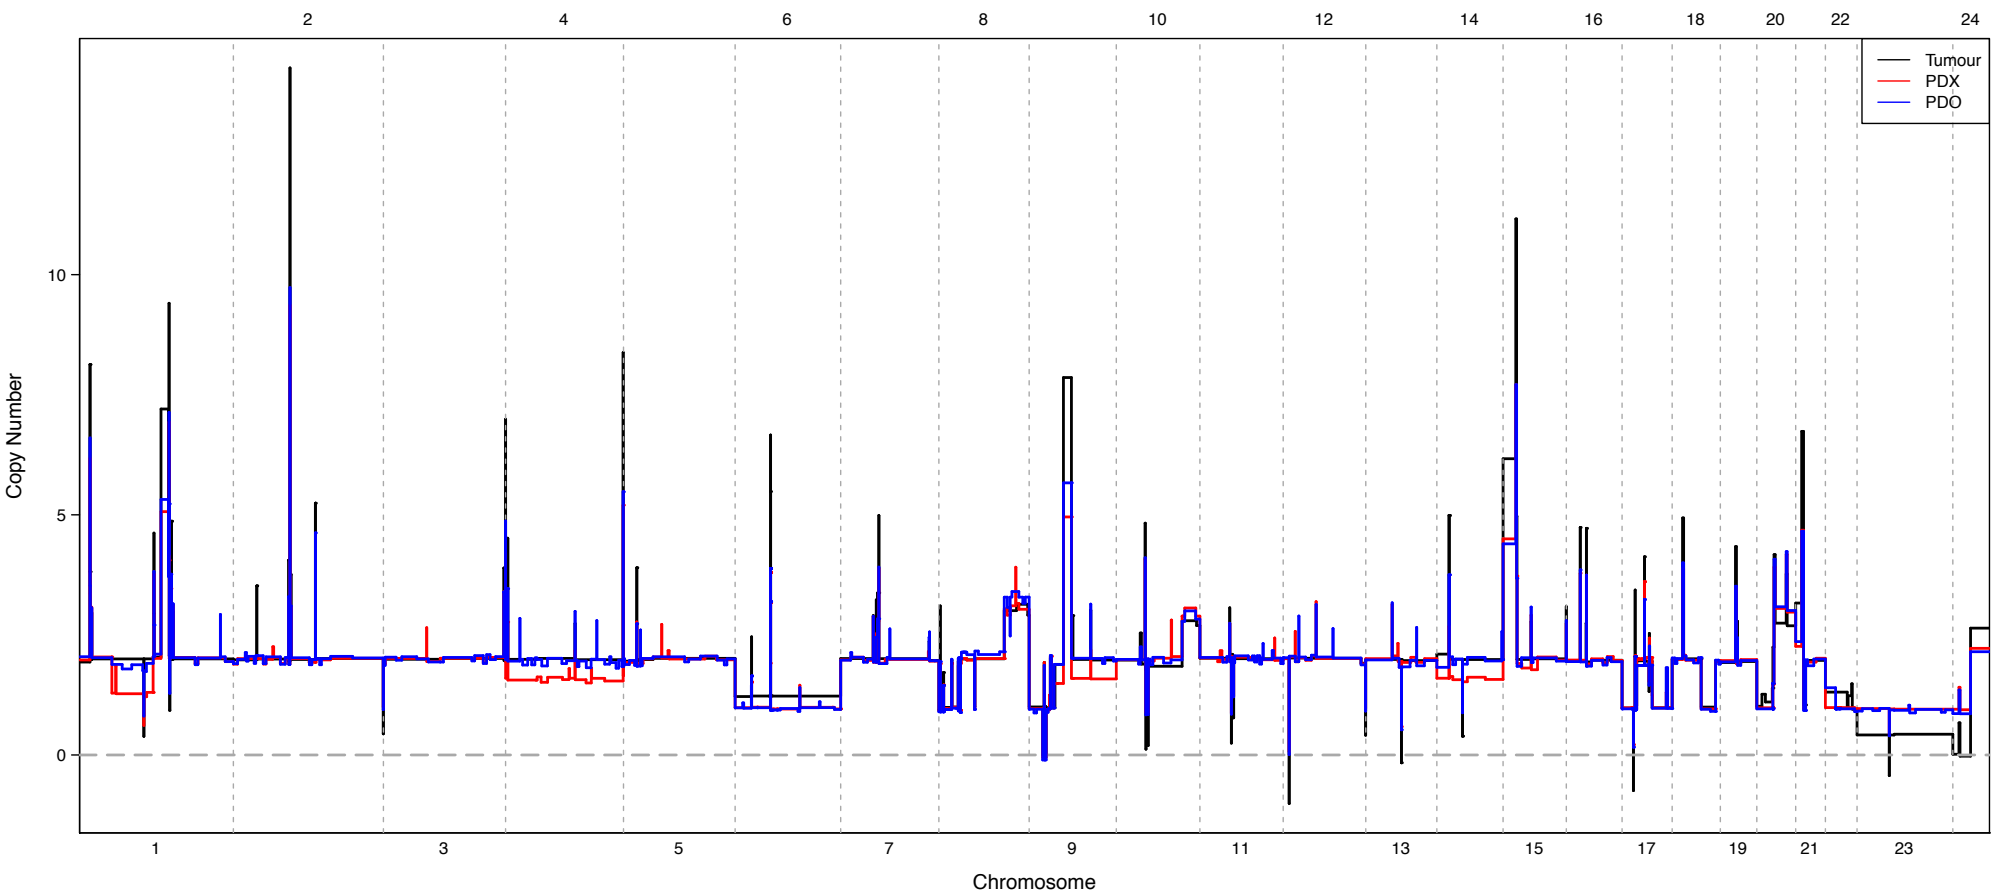

PCSI\_0642

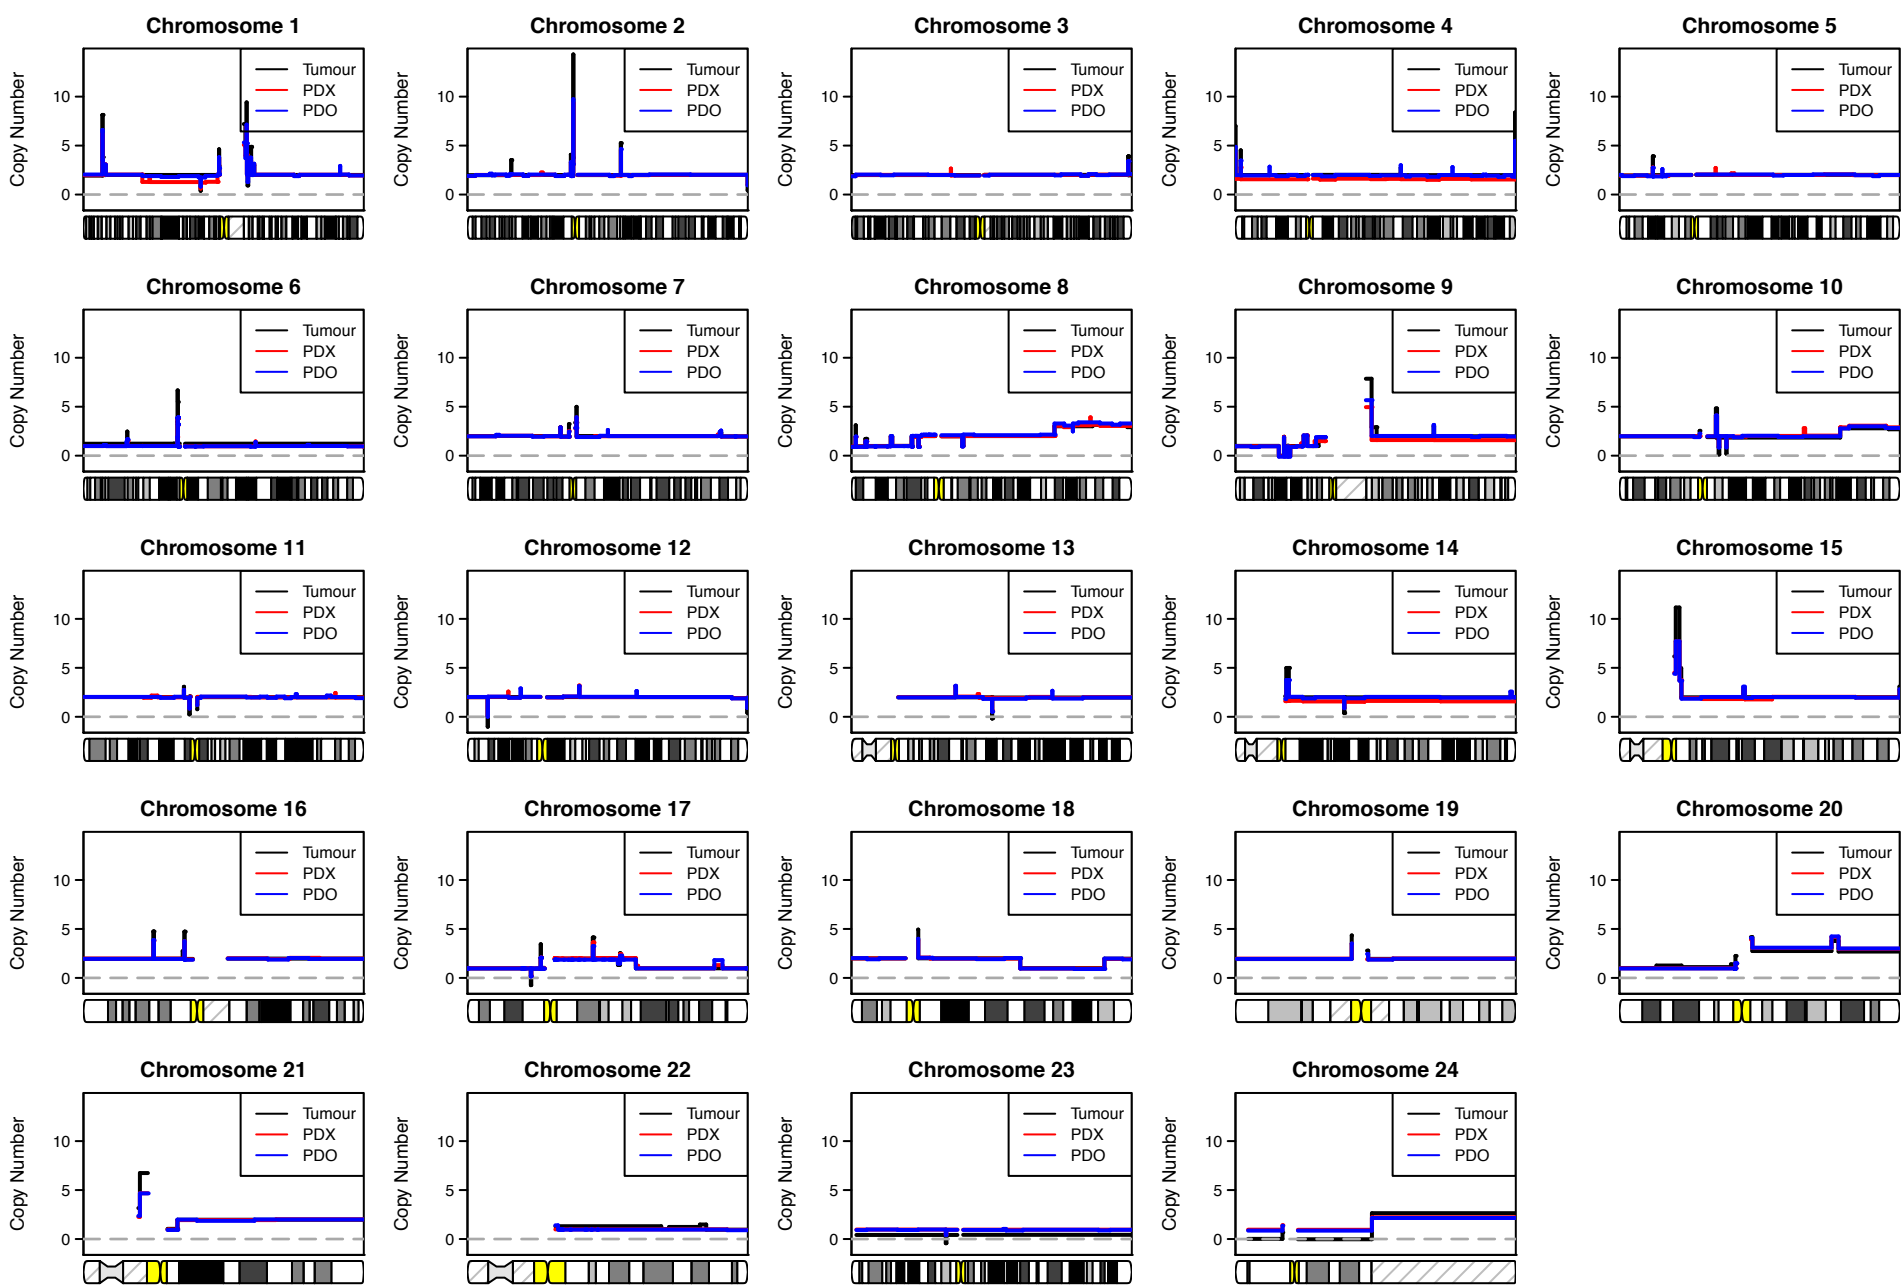

Supplement: S10 (10.1371/journal.pcbi.1006596.s010) [file journal.pcbi.1006596.s010]
